# Supplementary material
Source: PubMed Central journal article supplement (PMC139292)
Supplement: pnas_99_26_17197__2.pdf [file pnas_99_26_17197__2.pdf]

**Table 6. Root morphology of 35S::*GLB1* and C24 plants**

| Plants            | Age in days | Root hair density, number per mm | Length of root elongation zone and tip | Number of lateral roots | Approx. root length, mm |
|-------------------|-------------|----------------------------------|----------------------------------------|-------------------------|-------------------------|
| C24               | 13          | nd                               | nd                                     | 3 (7)                   | 20 (7)                  |
| 35S:: <i>GLB1</i> | 13          | nd                               | nd                                     | 4 (7)                   | 20 (7)                  |
| C24               | 15          | 34 (6)                           | 35 (6)                                 | 5 (7)                   | 22 (6)                  |
| 35S:: <i>GLB1</i> | 15          | 30 (6)                           | 44 (6)                                 | 7 (7)                   | 26 (6)                  |
| C24               | 17          | 38 (5)                           | 31 (5)                                 | 7 (7)                   | 26 (6)                  |
| 35S:: <i>GLB1</i> | 17          | 29* (5)                          | 42 (5)                                 | 10 (7)                  | 31* (6)                 |
| C24               | 23          | 27 (7)                           | 45 (7)                                 | 15 (7)                  | 34 (6)                  |
| 35S:: <i>GLB1</i> | 23          | 16* (6)                          | 52 (6)                                 | 24* (7)                 | 46* (5)                 |

nd, not done. Numbers in parentheses = sample size.

\*Significantly different to C24  $P < 0.05$  (Student's *t* test).
